# Supplementary material for: Glacial state of the global carbon cycle: time-slice simulations for the last glacial maximum with an Earth-system model
Source: Copernicus journal article supplement (doi:10.5194/cp-2022-8), 2022-02-14
Supplement: Supplementary file [file cp-2022-8-AC1-supplement.pdf]

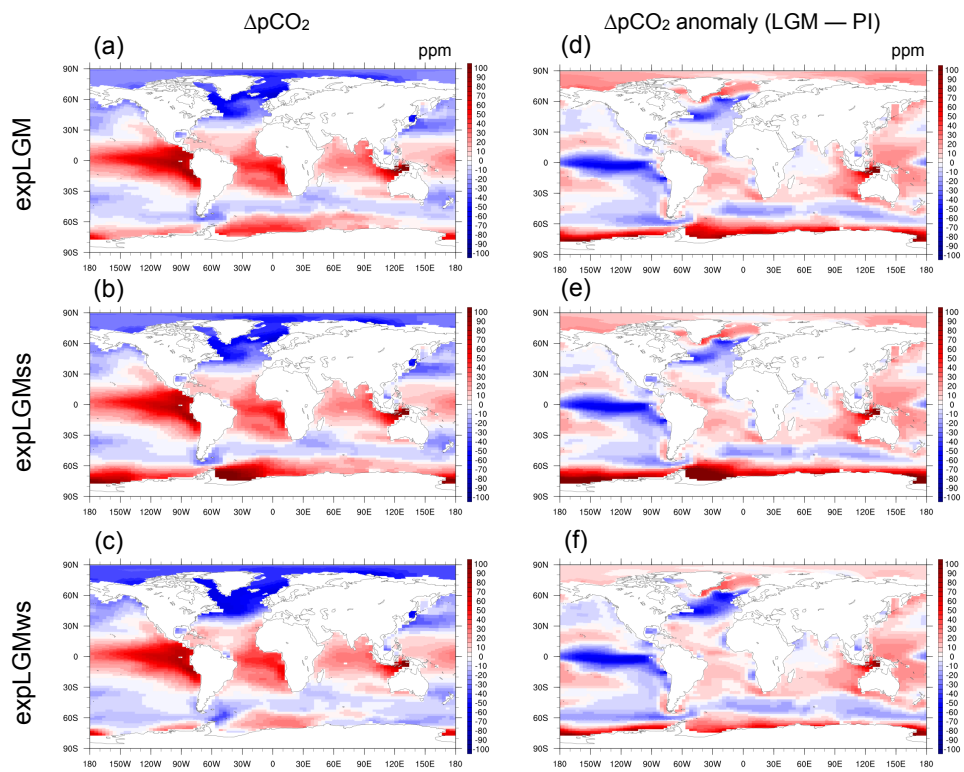

**Figure C1.** Global maps of the difference in  $p\text{CO}_2$  between the surface ocean and the atmosphere ( $\Delta p\text{CO}_2$ ) for the three LGM experiments in this study (a-c). Where  $\Delta p\text{CO}_2$  is positive,  $p\text{CO}_2$  is higher in the surface ocean, corresponding to a net source for atmospheric  $\text{CO}_2$ . The differences in  $\Delta p\text{CO}_2$  between each LGM simulation and expPI are also shown (d-f).
